# Supplementary figures and images for: Using Alternative Sources of Energy for Decarbonization: A Piece of Cake, but How to Cook This Cake?
Source: MDPI journal article supplement (doi:10.3390/ijerph192316286), 2022-12-05

**Schematics.** Classification of alternative sources of energy (ASEs).

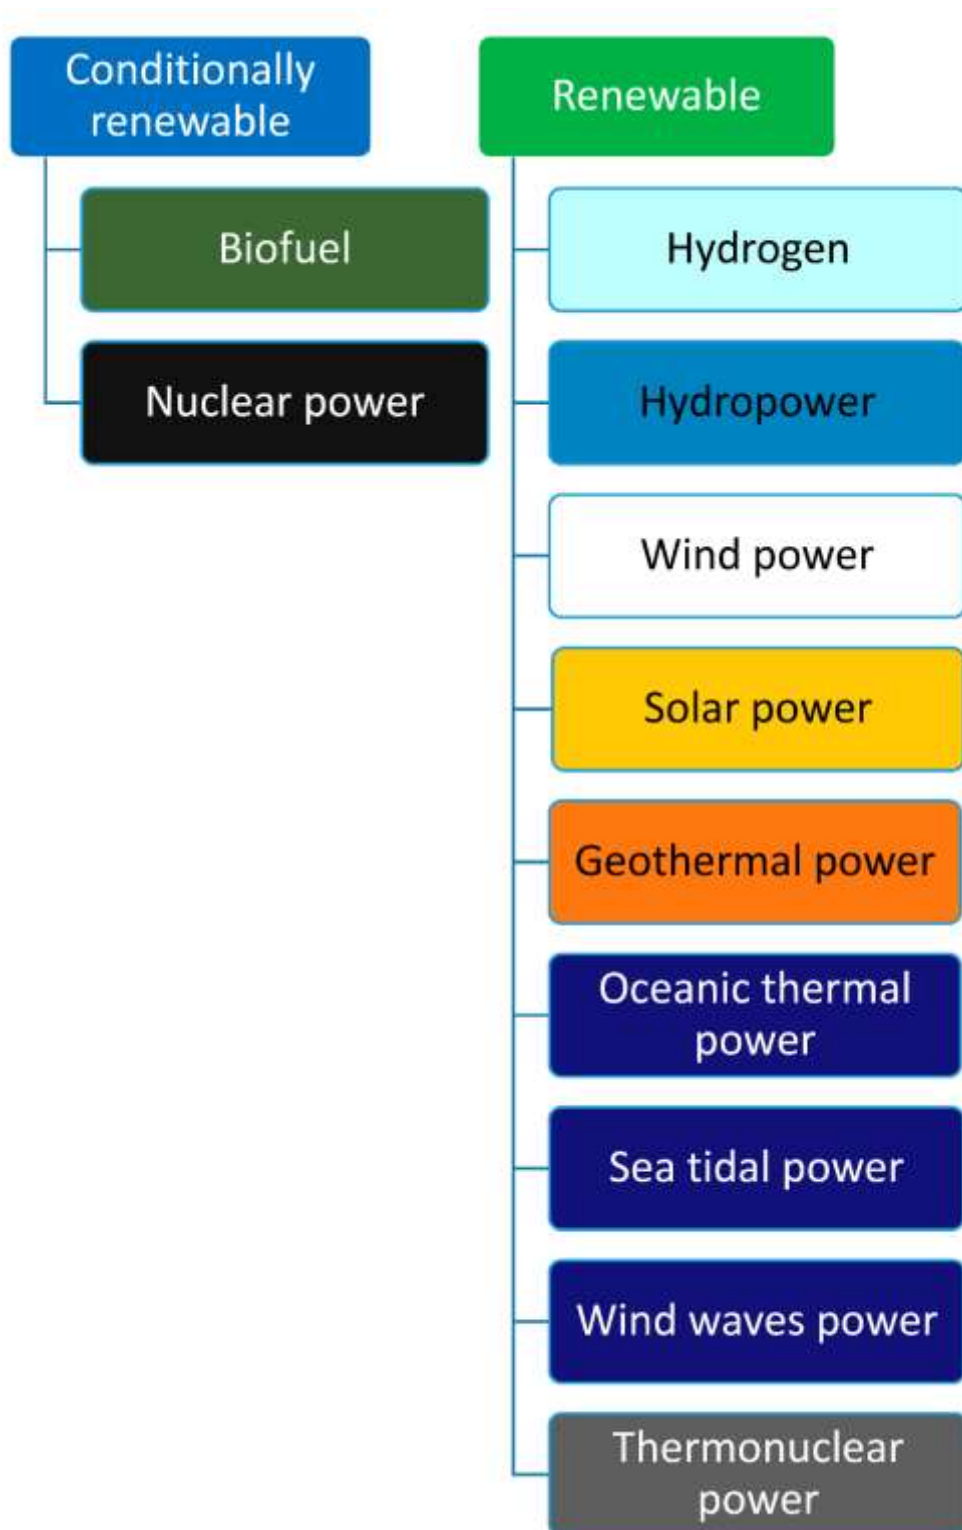

Supplement: s1 [file s1]
